# Supplementary material
Source: PubMed Central journal article supplement (PMC3683771)
Supplement: 1220712110_pnas.201220712SI.pdf [file 1220712110_pnas.201220712SI.pdf]

# Supporting Information

Zhang et al. 10.1073/pnas.1220712110

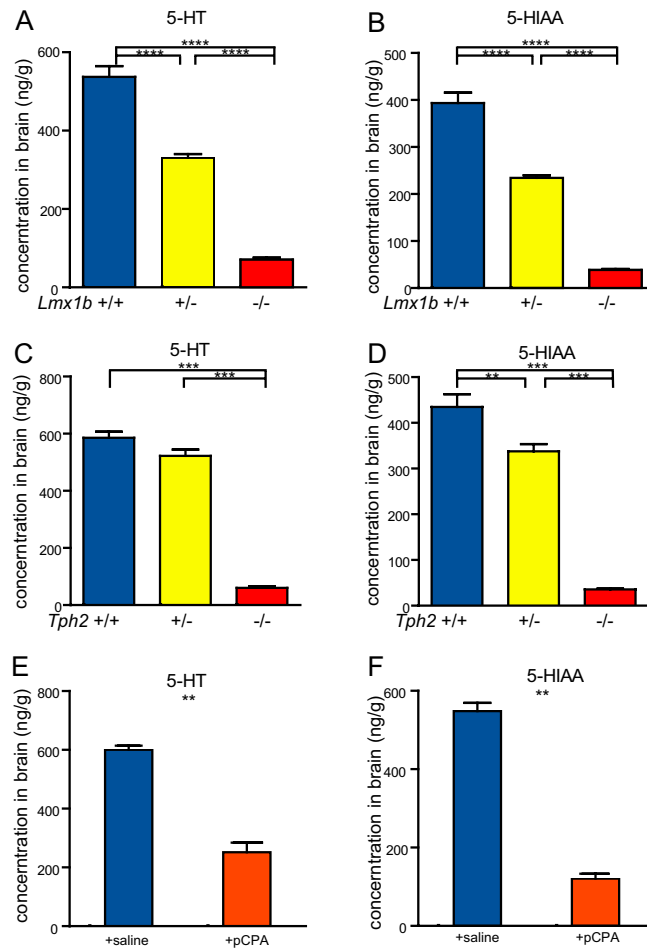

**Fig. S1.** Levels of 5-hydroxytryptamine (5-HT) and 5-hydroxyindoleacetic acid (5-HIAA) in the brain. (A) 5-HT in the brains of *Lmx1b*<sup>+/+</sup> (<sup>+/+</sup>, *n* = 7), *Lmx1b*<sup>+/-</sup> (<sup>+/-</sup>, *n* = 7), and *Lmx1b*<sup>-/-</sup> (<sup>-/-</sup>, *n* = 7) female mice were analyzed by HPLC. (B) 5-HIAA in the brains of *Lmx1b*<sup>+/+</sup>, *Lmx1b*<sup>+/-</sup>, and *Lmx1b*<sup>-/-</sup> females. (C) 5-HT in the brains of *Tph2*<sup>-/-</sup> (*n* = 7), *Tph2*<sup>+/-</sup> (*n* = 8), and *Tph2*<sup>+/+</sup> (*n* = 7) females. (D) 5-HIAA in the brains of *Tph2*<sup>-/-</sup>, *Tph2*<sup>+/-</sup>, and *Tph2*<sup>+/+</sup> females. (E) 5-HT in the brains of female mice injected with saline (*n* = 5) or *p*-chlorophenylalanine (pCPA) (*n* = 6). (F) 5-HIAA in the brains of female mice injected with saline or pCPA. \**P* < 0.05, \*\**P* < 0.01, \*\*\**P* < 0.001.

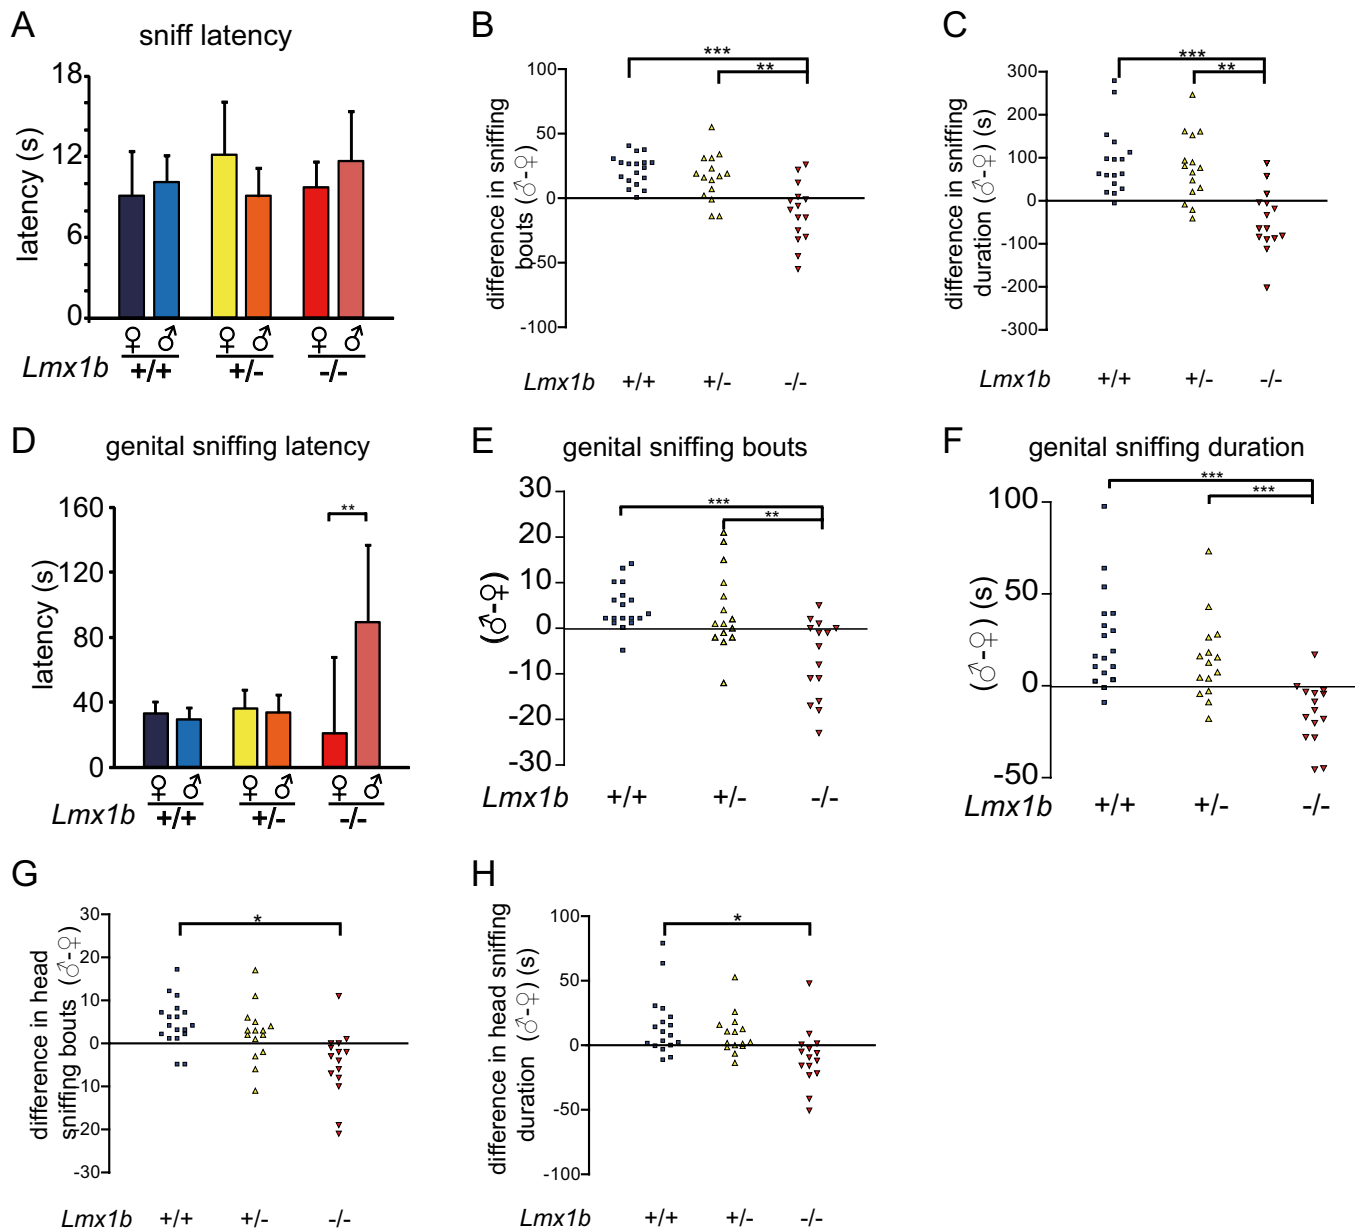

**Fig. S2.** Sexual preference of females in the mating choice assay.  $n = 18$  for  $Lmx1b^{+/+}$  ( $+/+$ ),  $n = 15$  for  $Lmx1b^{+/-}$  ( $+/-$ ),  $n = 15$  for  $Lmx1b^{-/-}$  ( $-/-$ ).  $*P < 0.05$ ,  $**P < 0.01$ ,  $***P < 0.001$ . (A) Sniff latencies of the whole body were not different among  $Lmx1b^{-/-}$  females and their  $Lmx1b^{+/+}$  or  $Lmx1b^{+/-}$  female littermates. (B) Difference in sniffing bouts analyzed in individual females. (C) Difference in sniffing duration analyzed in individual females. (D) The latency to sniff male genital was lengthened in  $Lmx1b^{-/-}$  females; thus, they sniffed female genitals first, whereas their female littermates did not show sexual preference in genital sniffing latency. (E) Genital sniffing bouts were analyzed by differences of each individual female: its bouts for sniffing male minus its bouts for sniffing female. (F) Genital sniffing duration was analyzed in individual females: its duration of sniffing males minus its duration of sniffing females. (G) Difference in sniffing head bouts analyzed in individual females. (H) Difference in sniffing head duration analyzed in individual females.

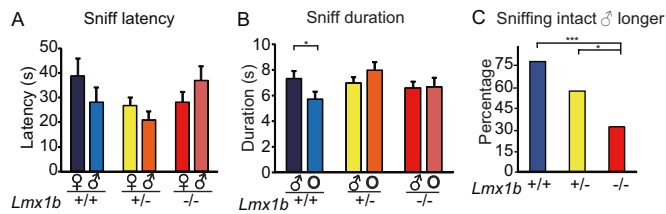

**Fig. S3.** *Lmx1b*<sup>-/-</sup> females prefer intact over castrated male genital odor. (A) Data are from the same experiments as those in Fig. 2. Latencies of females of different genotype to sniff male or female genital odor were not statistically different. (B and C) *n* = 32 for *Lmx1b*<sup>+/+</sup>, *n* = 36 for *Lmx1b*<sup>+/-</sup>, *n* = 40 for *Lmx1b*<sup>-/-</sup>. (B) *Lmx1b*<sup>+/+</sup> females sniffed intact male genital odor longer than castrated male genital odor (o); *Lmx1b*<sup>+/-</sup> and *Lmx1b*<sup>-/-</sup> females did not show preference between genital odors of intact males and castrated males. (C) Compared with their *Lmx1b*<sup>+/+</sup> and *Lmx1b*<sup>+/-</sup> female littermates, a smaller percentage of *Lmx1b*<sup>-/-</sup> females sniffed intact male genital odor longer than castrated male genital odor.

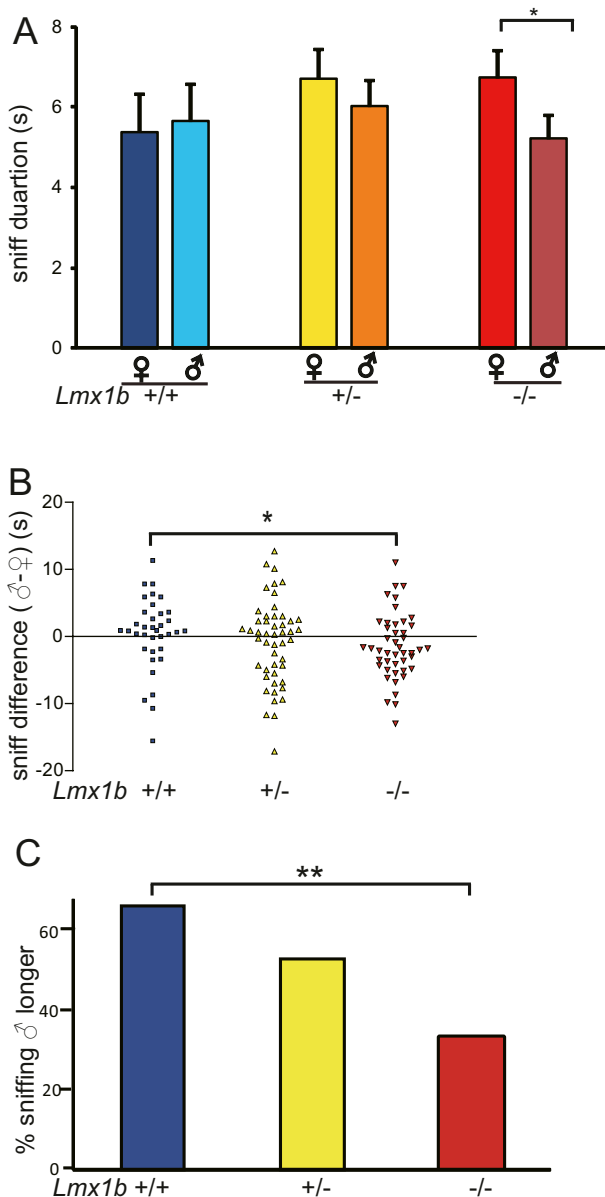

**Fig. S4.** Genital odor preference of females. A test female was presented with a slide smeared with male genital excretion and diestrous female genital excretion. *n* = 36 for *Lmx1b*<sup>+/+</sup> (*n*<sub>+/+</sub>), *n* = 49 for *Lmx1b*<sup>+/-</sup> (*n*<sub>+/-</sub>), *n* = 45 for *Lmx1b*<sup>-/-</sup> (*n*<sub>-/-</sub>). \**P* < 0.05, \*\**P* < 0.01. (A) *Lmx1b*<sup>-/-</sup> females preferred the genital odor of diestrous females over that of males. (B) Analysis of difference in sniff duration in females. (C) Percentage of females sniffing male genital odor longer than that of diestrous female.













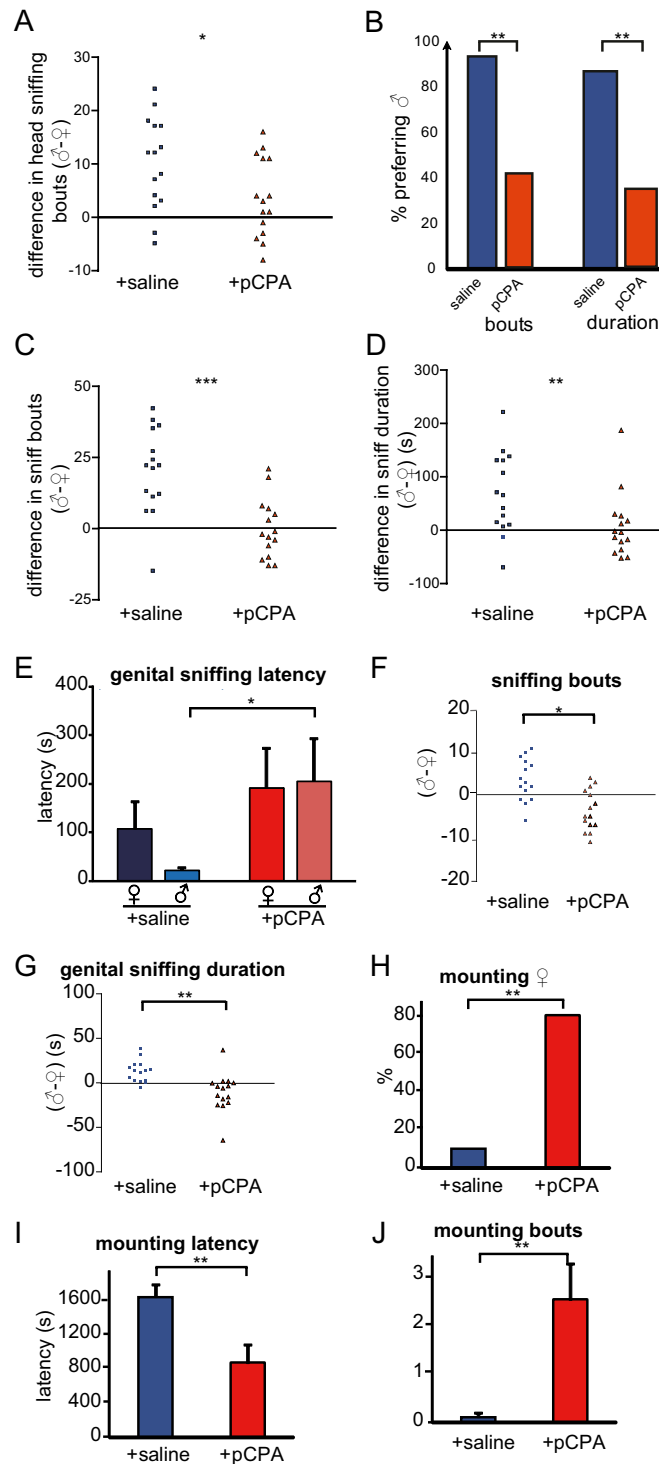

**Fig. S11.** (A–D) Sexual preference of females treated with pCPA. (A–G) Each C57BL/6J female treated with either saline (+saline,  $n = 15$ ) or pCPA (+pCPA,  $n = 15$ ) was presented with a male and a female target mouse. (H–J) Each adult C57BL/6J female was treated with saline ( $n = 10$ ) or pCPA ( $n = 10$ ) and presented with a female. (A) The preference for male heads in sniffing bouts by females was significantly reduced by pCPA. (B) The percentage of female preferring (the whole body of) males in bouts or duration was significantly reduced by pCPA. (C) Analysis of difference in sniff duration of individual females. (D) Analysis of difference in sniff duration of individual females.  $*P < 0.05$ ,  $**P < 0.01$ ,  $***P < 0.001$ . (E) The latency for sniffing male genitals is significantly later in pCPA-treated females than in control females. (F and G) Analysis of differences in genital sniffing bouts and duration in individual females. (H–J) pCPA-treated females fiercely mounted females. (H) pCPA increased the percentage of females mounting intruder females. pCPA decreased mounting latency (I) and increased mounting bouts (J) of females. Data are from the same experiments as those in Fig. 6.

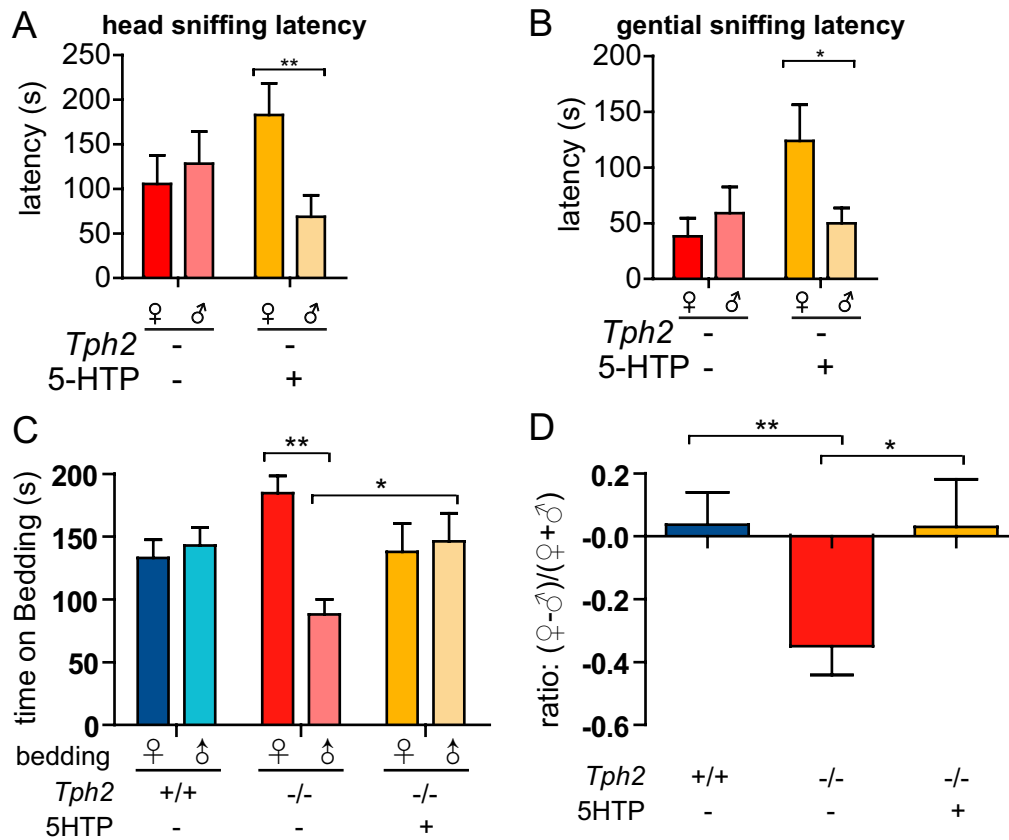

**Fig. S12.** 5-HTP rescue of sexual preference of adult females in sniff latency and bedding preference. (A and B) Data are from the same experiments as those in Fig. 6 H–K. (A) Injection of 5-HTP rescued the same-sex preference in head-sniffing latency of *Tph2*<sup>-/-</sup> females. (B) Injection of 5-HTP could rescue the same-sex preference in genital sniffing latency of *Tph2*<sup>-/-</sup> females. (C and D) Bedding preference of females treated with 5-HTP. *Tph2*<sup>+/+</sup> females were treated with saline (*n* = 11). *Tph2*<sup>-/-</sup> females were treated with saline (*n* = 12) or 5-HTP (*n* = 12). \**P* < 0.05, \*\**P* < 0.01. (C) *Tph2*<sup>-/-</sup> females strongly preferred female over bedding. 5HTP rescued the bedding preference of *Tph2*<sup>-/-</sup> females. (D) Compared with *Tph2*<sup>+/+</sup>, a higher percentage of *Tph2*<sup>-/-</sup> females spent more time above female bedding than male bedding. 5HTP rescued the bedding ratio of *Tph2*<sup>-/-</sup>.
